# Supplementary material for: Adjoint-based Calibration of Inlet Boundary Condition for Atmospheric CFD Solvers
Source: Copernicus journal article supplement (doi:10.5194/wes-2019-6), 2019-02-11

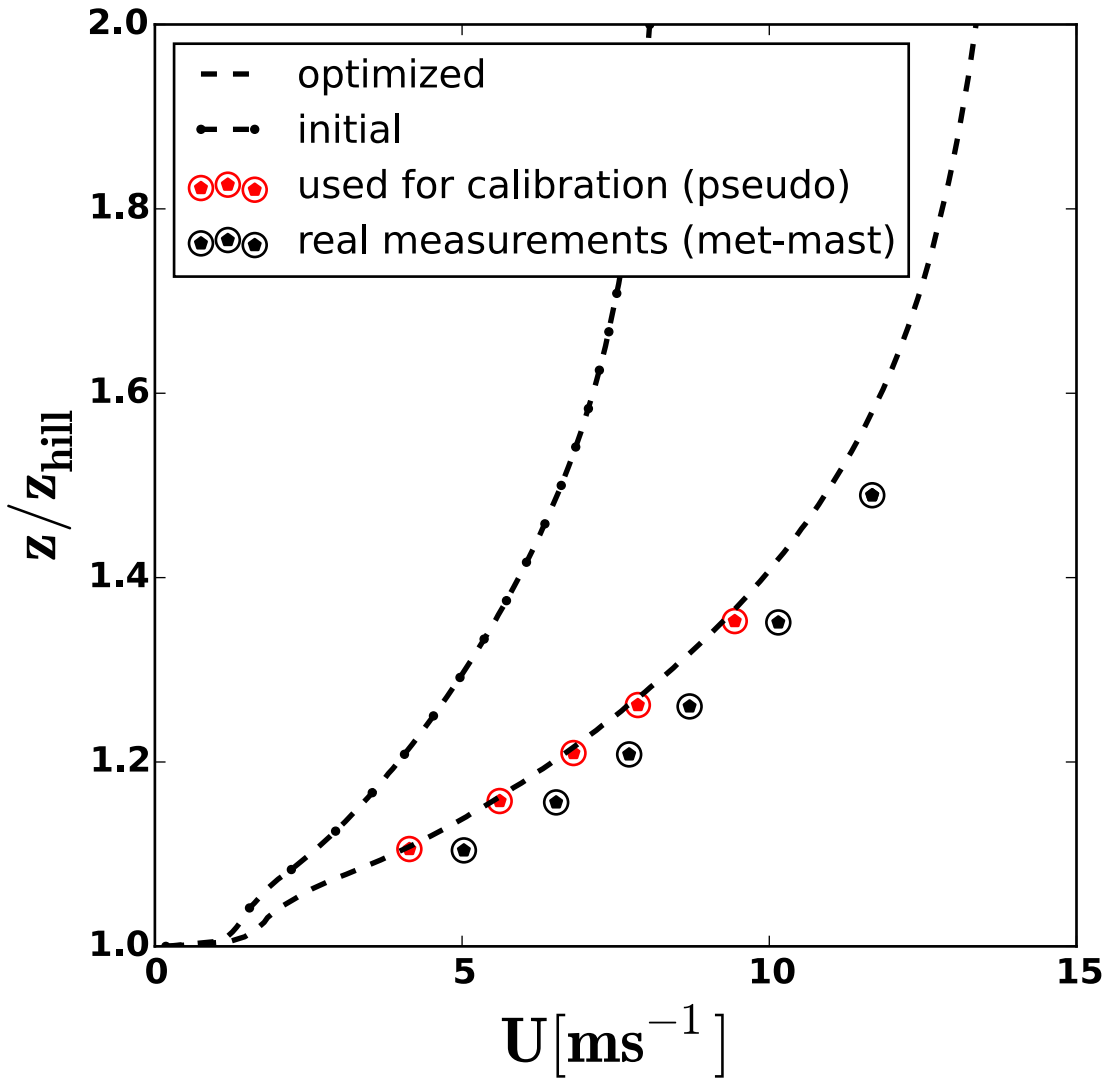

Supplement: Supplementary file [file wes-2019-6-AC1-supplement.pdf]
